# Supplementary material
Source: publisher figshare collection journal article supplement (https://acs.figshare.com/ndownloader/files/5510330)
Supplement: Supplementary file 1 [file 5510330]

# Supporting Information

## Calixarene Assisted Rapid Synthesis of Silver-Graphene Nanocomposites with Enhanced Antibacterial Activity

Suela Kellici,<sup>\*,†</sup> John Acord,<sup>‡</sup> Arni Vaughn,<sup>†</sup> Nicholas P. Power,<sup>‡</sup> David J. Morgan,<sup>§</sup> Tobias Heil,<sup>||</sup> Sébastien P. Facq,<sup>⊥</sup> and Giulio I. Lampronti<sup>⊥</sup>

<sup>†</sup>School of Engineering, London South Bank University, 103 Borough Road, London, SE1 0AA, United Kingdom. \*E-mail: kellicis@lsbu.ac.uk

<sup>‡</sup>School of Applied Sciences, London South Bank University, 103 Borough Road, London, SE1 0AA, United Kingdom

<sup>§</sup>Cardiff Catalysis Institute, School of Chemistry, Cardiff University, Park Place, Cardiff, CF10 3AT, United Kingdom

<sup>||</sup>Nanoinvestigation Centre at Liverpool, 1-3 Brownlow Street, Liverpool University, Liverpool, L69 3GL, United Kingdom

<sup>⊥</sup>Department of Earth Sciences, University of Cambridge, Downing Street, Cambridge, CB2 3EQ, United Kingdom

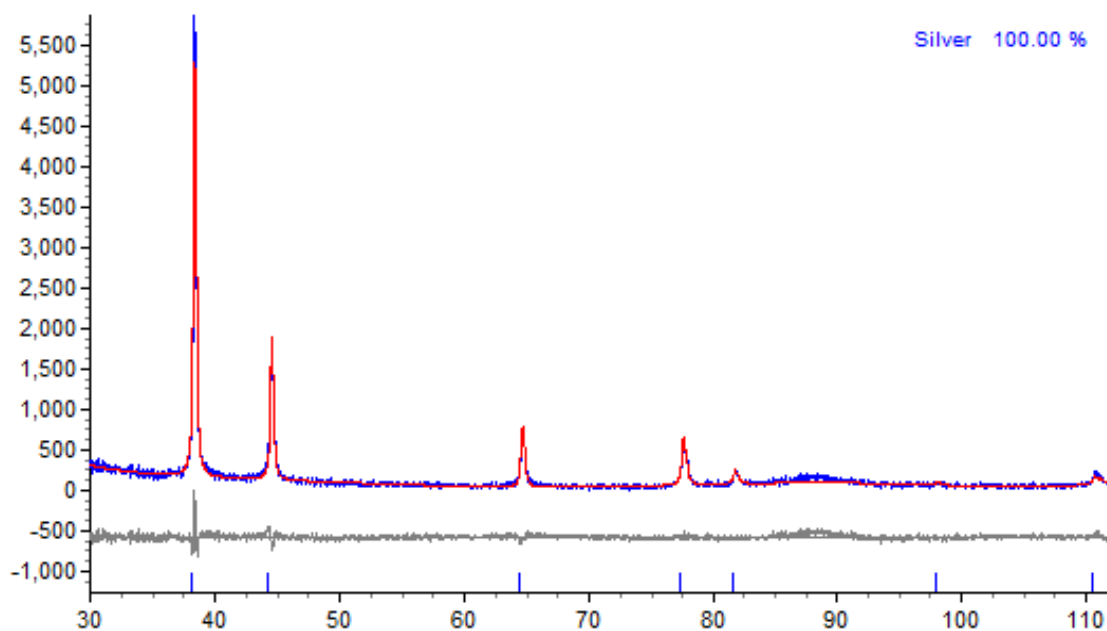

**Figure S1.** Rietveld refinement plot sample AgS-XC6: experimental, calculated and difference curve are in blue, red and grey respectively.

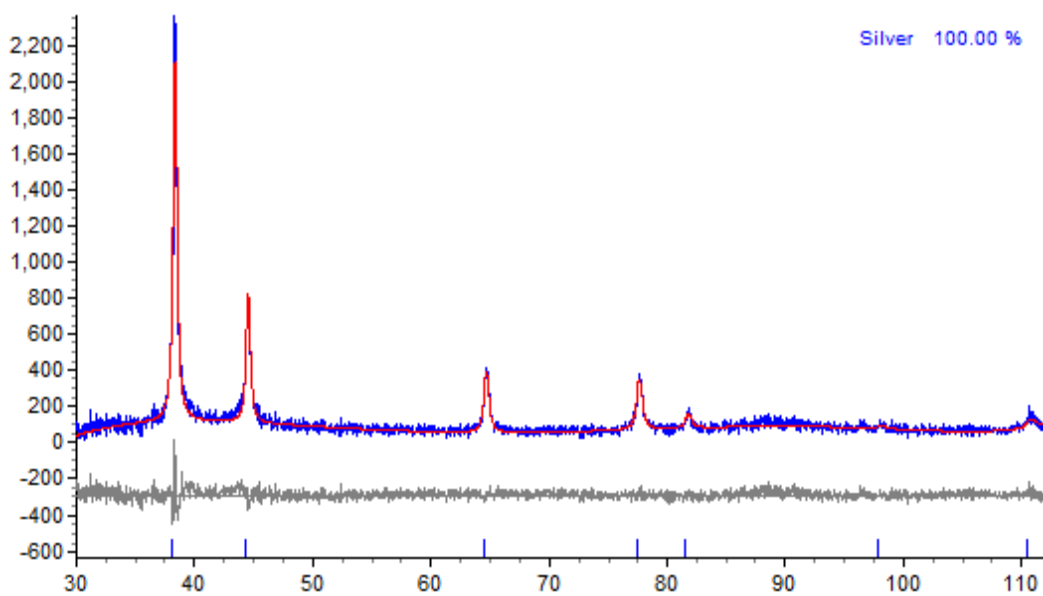

**Figure S2.** Rietveld refinement plot sample Ag-SCX6:GO (1:1): experimental, calculated and difference curve are in blue, red and grey respectively.

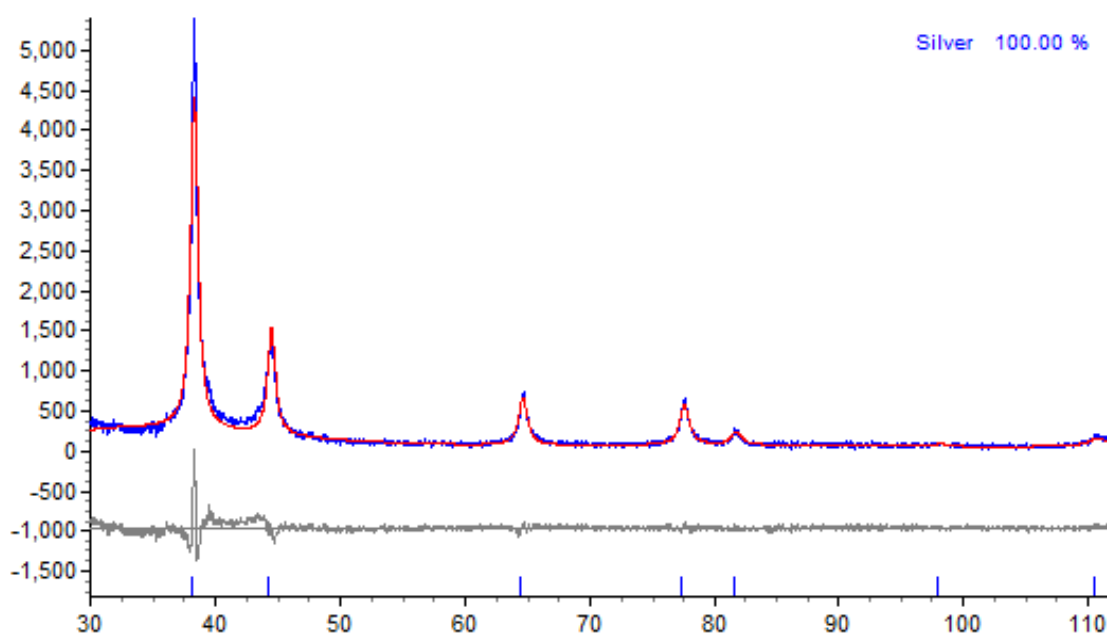

**Figure S3.** Rietveld refinement plot sample Ag-SCX6:GO (1:2): experimental, calculated and difference curve are in blue, red and grey respectively.

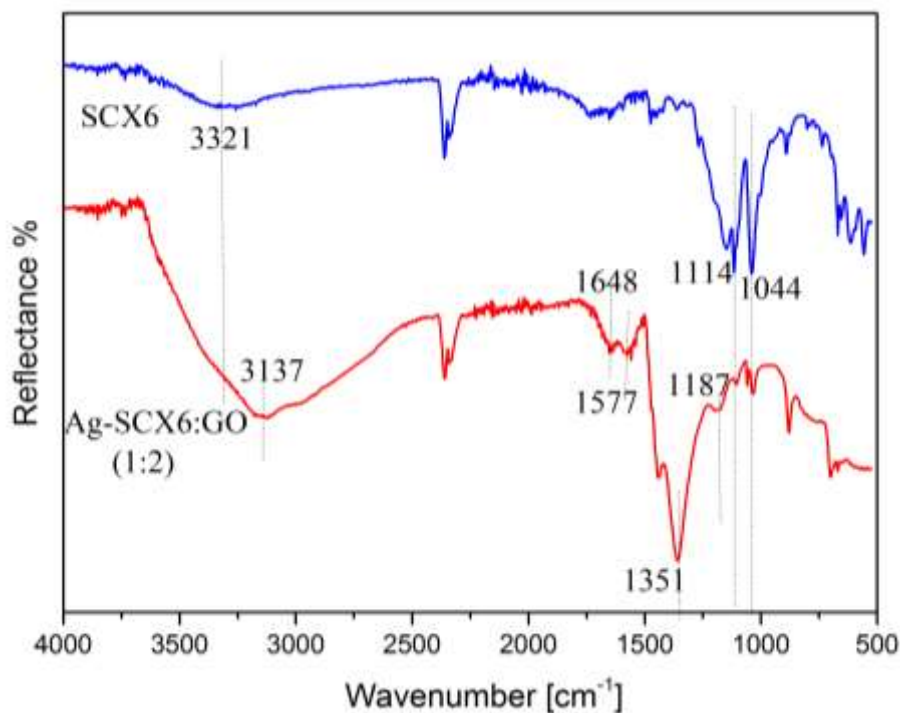

**Figure S4.** Representative FT-IR spectra of SCX6 and AG-SCX6:GO (1:2) revealing the presence of bands located at 1164 and 1047  $\text{cm}^{-1}$  which can be assigned to the  $\text{SO}_3$  groups of SCX6, also found in pure SXC6.<sup>1,2</sup> Additional bands located at 1351  $\text{cm}^{-1}$  ( $>\text{COO}^-$  symmetric

stretch), 1577  $\text{cm}^{-1}$  ( $>\text{C}=\text{C}$ , skeletal vibrations of graphitic domain), 1187  $\text{cm}^{-1}$  (symmetric stretching of epoxy groups) and the broad absorption band at 3390  $\text{cm}^{-1}$  (O–H stretching vibration and the absorbed water molecules) are also evident.<sup>3,4</sup>

## References:

- (1) Mao, X.; Tian D.; Li, H. p-Sulfonated Calix[6]arene Modified Graphene as a ‘Turn On’ Fluorescent Probe for L-carnitine in Living Cells. *Chem. Commun.*, **2012**, 48, 4851-4853.
- (2) Zhou, J.; Chen, M.; Diao, G. Calix[4,6,8]arenesulfonates Functionalized Reduced Graphene Oxide with High Supramolecular Recognition Capability: Fabrication and Application for Enhanced Host-Guest Electrochemical Recognition. *ACS Appl. Mater. Interfaces*, **2013**, 5, 828-836.
- (3) Galande, C.; Mohite, A. D.; Naumov, A. V.; Gao, W.; Ci, L.; Ajayan, A.; Gao, H.; Srivastava, A.; Bruce Weisman R.; Ajayan, P. M. Quasi-Molecular Fluorescence from Graphene Oxide. *Sci. Rep.*, **2011**, 1:85, 1-5.
- (4) Oh, J.; Lee, J.; Koo, J. C.; Choi, H. R.; Lee, Y.; Kim, T.; Luong N. D.; Nam, J. Graphene Oxide Porous Paper from Amine-Functionalized Poly(glycidyl methacrylate)/Graphene Oxide Core-Shell Microsphere. *J. Mater. Chem.*, **2010**, 20, 9200–9204.
